# Supplementary material for: Reactions of lanthanoid metals with 3,5-diphenylpyrazole at elevated temperatures: synthesis and structures of both homoleptic, [Ln3(Ph2pz)9] (Ln = La, Nd), [Ln2(Ph2pz)6] (Ln = Er, Lu), and heteroleptic, [Ln(Ph2pz)3(Ph2pzH)2] (Ln = La, Nd, Gd, Tb, Er or Yb), pyrazolate complexes
Source: Royal Society of Chemistry journal article supplement (doi:10.1039/b400541d), 2004-01-01
Supplement: b400541d.doc [file b400541d.doc]

**Table S1** Selected bond geometries of the Ln environment in [La3(Ph2pz)9] and *[Nd3(Ph2pz)9]*†; *r* is the Ln-N bond length (Å), other entries being the angles (o) subtended at Ln by the relevant atoms at the head of the row and column.

(a) Ln(1) environment

| Atom | *r* | N(12) | N(21) | N(22) | N(31) | N(32) | N(41) | N(42) |
| --- | --- | --- | --- | --- | --- | --- | --- | --- |
| N(11) | 2.431(3) | 32.15(9) | 89.11(9) | 92.30(9) | 143.86(8) | 166.17(8) | 116.74(9) | 117.70(9) |
|  | *2.370(4)* | *33.0(1)* | *89.0(1)* | *91.9(1)* | *142.9(1)* | *166.3(1)* | *116.9(1)* | *117.2(1)* |
| N(12) | 2.518(3) |  | 114.52(9) | 103.19(9) | 114.29(9) | 145.05(9) | 102.84(8) | 102.36(8) |
|  | 2.471(4) |  | *115.3(1)* | *102.9(1)* | *112.4(1)* | *143.8(1)* | *103.2(1)* | *121.1(1)* |
| N(21) | 2.478(3) |  |  | 32.32(9) | 104.52(9) | 82.93(9) | 138.30(8) | 110.41(8) |
|  | *2.421(4)* |  |  | *33.4(1)* | *105.9(1)* | *83.9(1)* | *136.7(1)* | *108.0(1)* |
| N(22) | 2.459(3) |  |  |  | 82.23(9) | 74.96(9) | 150.90(9) | 134.81(8) |
|  | *2.403(4)* |  |  |  | *83.8(1)* | *75.7(1)* | *151.1(1)* | *134.1(1)* |
| N(31) | 2.569(3) |  |  |  |  | 31.06(8) | 74.35(9) | 89.07(9) |
|  | *2.513(5)* |  |  |  |  | *31.6(1)* | *74.8(1)* | *90.7(1)* |
| N(32) | 2.665(3) |  |  |  |  |  | 76.28(8) | 75.83(8) |
|  | *2.608(4)* |  |  |  |  |  | *75.9(1)* | *76.2(1)* |
| N(41) | 2.714(3) |  |  |  |  |  |  | 29.49(8) |
|  | *2.639(4)* |  |  |  |  |  |  | *30.2(1)* |
| N(42) | 2.718(3) |  |  |  |  |  |  |  |
|  | *2.657(4)* |  |  |  |  |  |  |  |

(b) Ln(3) environment

| Atom | *r* | N(82) | N(91) | N(92) | N(61) | N(62) | N(71) | N(72) |
| --- | --- | --- | --- | --- | --- | --- | --- | --- |
| N(81) | 2.453(3) | 32.62(9) | 91.87(9) | 93.43(9) | 168.39(8) | 145.36(9) | 116.58(8) | 112.63(8) |
|  | *2.385(4)* | *33.6(1)* | *90.8(1)* | *92.7(1)* | *168.1(1)* | *144.6(1)* | *116.7(1)* | *113.2(1)* |
| N(82) | 2.463(3) |  | 114.59(9) | 100.17(9) | 143.20(9) | 113.44(9) | 121.68(8) | 101.67(8) |
|  | *2.403(3)* |  | *114.5(1)* | *99.8(1)* | *142.5(1)* | *111.8(1)* | *122.6(1)* | *102.1(1)* |
| N(91) | 2.465(3) |  |  | 32.59(9) | 82.23(8) | 105.20(9) | 112.09(8) | 140.34(9) |
|  | *2.416(4)* |  |  | *33.4(1)* | *83.0(1)* | *106.4(1)* | *110.6(1)* | *139.6(1)* |
| N(92) | 2.453(3) |  |  |  | 76.21(8) | 86.04(8) | 137.27(9) | 153.94(8) |
|  | *2.412(4)* |  |  |  | *76.4(1)* | *86.1(1)* | *136.6(1)* | *154.0(1)* |
| N(61) | 2.725(3) |  |  |  |  | 30.62(9) | 74.99(8) | 77.79(8) |
|  | *2.647(4)* |  |  |  |  | *31.5(1)* | *75.1(1)* | *77.7(1)* |
| N(62) | 2.577(3) |  |  |  |  |  | 84.98(8) | 72.33(8) |
|  | *2.520(4)* |  |  |  |  |  | *86.5(1)* | *72.9(1)* |
| N(71) | 2.726(3) |  |  |  |  |  |  | 29.36(8) |
|  | *2.664(4)* |  |  |  |  |  |  | *30.0(1)* |
| N(72) | 2.770(2) |  |  |  |  |  |  |  |
|  | *2.697(4)* |  |  |  |  |  |  |  |

† The italicised entries represent values for the neodymium complex

(c) The central Ln (Ln(2)) environments

| Atoms | *r* | N(52)† | N(41) | N(42) | N(71) | N(72) | N(31) | N(32) | N(61) | N(62) |
| --- | --- | --- | --- | --- | --- | --- | --- | --- | --- | --- |
| N(51)† | 2.466(3) | 32.6(1) | 90.4(1) | 119.3(1) | 148.2(1) | 118.0(1) | 84.94(9) | 112.45(9) | 96.1(1) | 78.98(9) |
|  | *2.399(4)* | *33.6(2)* | *90.5(1)* | *119.8(1)* | *148.8(1)* | *118.0(1)* | *83.3(1)* | *110.6(1)* | *95.3(1)* | *78.0(1)* |
| N(52)† | 2.467(3) |  | 118.2(1) | 146.68(9) | 121.3(1) | 90.7(1) | 79.54(9) | 98.8(1) | 112.6(1) | 85.51(9) |
|  | *2.399(5)* |  | *118.4(1)* | *147.0(1)* | *121.2(1)* | *90.0(1)* | *77.3(1)* | *95.9(1)* | *112.2(1)* | *84.7(1)* |
| N(41) | 2.526(3) |  |  | 29.17(8) | 120.00(9) | 150.94(9) | 71.39(8) | 80.25(9) | 86.90(9) | 110.93(8) |
|  | *2.463(4)* |  |  | *29.7(1)* | *119.6(1)* | *151.2(1)* | *70.8(1)* | *79.9(1)* | *89.0(1)* | *113.2(1)* |
| N(42) | 2.835(3) |  |  |  | 90.84(8) | 121.79(8) | 80.24(8) | 74.43(8) | 80.37(9) | 109.84(8) |
|  | *2.792(5)* |  |  |  | *89.9(1)* | *121.6(1)* | *80.4(1)* | *74.6(1)* | *82.9(1)* | *112.7(1)* |
| N(71) | 2.667(2) |  |  |  |  | 30.96(9) | 111.98(7) | 83.80(8) | 78.00(8) | 81.33(8) |
|  | *2.604(4)* |  |  |  |  | *31.7(1)* | *113.2(1)* | *84.9(1)* | *78.1(1)* | *81.9(1)* |
| N(72) | 2.531(3) |  |  |  |  |  | 114.32(8) | 93.04(8) | 84.41(8) | 71.98(8) |
|  | *2.462(4)* |  |  |  |  |  | *114.5(1)* | *93.1(1)* | *84.2(1)* | *71.8(1)* |
| N(31) | 2.922(3) |  |  |  |  |  |  | 28.70(8) | 158.27(9) | 163.73(7) |
|  | *2.910(4)* |  |  |  |  |  |  | *28.7(1)* | *159.6(1)* | *160.8(1)* |
| N(32) | 2.628(3) |  |  |  |  |  |  |  | 148.55(9) | 164.55(7) |
|  | *2.562(4)* |  |  |  |  |  |  |  | *151.7(1)* | *164.9(1)* |
| N(61) | 2.605(3) |  |  |  |  |  |  |  |  | 29.66(9) |
|  | *2.536(4)* |  |  |  |  |  |  |  |  | *29.9(1)* |
| N(62) | 2.829(3) |  |  |  |  |  |  |  |  |  |
|  | *2.810(4)* |  |  |  |  |  |  |  |  |  |
| Ln(2)···Ln(1;3) are 4.0853(3), *3.9946(4);* 4.0357(3), *3.9288(4)* Å; †Ligand 5 is terminal. | | | | | | | | | | |

**Table S2** Ln(1,3)···C(pz) (ligand 4,7) distances (Å) for [La3(Ph2pz)9] and *[Nd3(Ph2pz)9]* and the corresponding residual values *r* (Å) obtained by subtraction of the ionic radii21 for eight coordinate Ln3+ from Ln(1,3)···C(pz) distances

| Contact | Length | *r* | Contact | Length | *r* |
| --- | --- | --- | --- | --- | --- |
| Ln(1)···C(43) | 2.982(3) | 1.82 | Ln(3)···C(73) | 3.035(3) | 1.88 |
|  | *2.937(5)* | *1.83* |  | *2.985(5)* | *1.88* |
| Ln(1)···C(44) | 3.131(3) | 1.97 | Ln(3)···C(74) | 3.148(3) | 1.99 |
|  | *3.094(5)* | *1.99* |  | *3.110(5)* | *2.00* |
| Ln(1)···C(45) | 2.977(3) | 1.82 | Ln(3)···C(75) | 2.966(3) | 1.81 |
|  | *2.916(5)* | *1.81* |  | *2.930(5)* | *1.82* |

**Table S3** Selected bond geometries of the Ln environment in [Er2(Ph2pz)6] and *[Lu2(Ph2pz)6]*; *r* is the Ln-N bond length (Å), other entries being the angles (o) subtended at Ln by the relevant atoms at the head of the row and column.

(a) Ln(1) environment

| Atom | *r* | N(12) | N(21) | N(22) | N(31) | N(32) | N(41) | N(42) |
| --- | --- | --- | --- | --- | --- | --- | --- | --- |
| N(11) | 2.273(8) | 35.7(3) | 115.6(3) | 103.1(3) | 118.0(3) | 93.4(3) | 109.2(3) | 142.5(3) |
|  | *2.242(6)* | *35.8(2)* | *114.6(2)* | *102.1(2)* | *118.7(2)* | *93.6(2)* | *108.1(2)* | *141.4(2)* |
| N(12) | 2.278(8) |  | 99.8(3) | 109.7(3) | 94.3(3) | 85.5(3) | 139.9(3) | 168.8(3) |
|  | *2.253(6)* |  | *99.0(2)* | *109.3(2)* | *94.5(2)* | *85.7(2)* | *139.3(2)* | *169.0(2)* |
| N(21) | 2.259(7) |  |  | 35.7(3) | 103.6(3) | 137.2(3) | 117.6(3) | 90.0(3) |
|  | *2.220(5)* |  |  | *36.4(2)* | *103.4(2)* | *137.7(2)* | *118.3(2)* | *91.2(2)* |
| N(22) | 2.288(8) |  |  |  | 134.2(3) | 163.2(3) | 94.5(3) | 81.4(3) |
|  | *2.275(5)* |  |  |  | *134.4(2)* | *163.8(2)* | *93.8(2)* | *81.4(2)* |
| N(31) | 2.397(9) |  |  |  |  | 33.7(3) | 90.5(3) | 78.1(3) |
|  | *2.357(6)* |  |  |  |  | *34.5(2)* | *92.1(2)* | *79.1(2)* |
| N(32) | 2.453(8) |  |  |  |  |  | 76.8(2) | 83.6(3) |
|  | *2.430(5)* |  |  |  |  |  | *77.6(2)* | *84.0(2)* |
| N(41) | 2.504(8) |  |  |  |  |  |  | 33.7(3) |
|  | *2.463(6)* |  |  |  |  |  |  | *33.7(2)* |
| N(42) | 2.479(8) |  |  |  |  |  |  |  |
|  | *2.422(6)* |  |  |  |  |  |  |  |

(b) Ln(2) environment†

| Atom | *r* | N(62) | N(51) | N(52) | N(41) | N(42) | N(31) | N(32) |
| --- | --- | --- | --- | --- | --- | --- | --- | --- |
| N(61) | 2.261(9) | 35.1(3) | 104.0(3) | 113.6(3) | 80.4(3) | 90.3(3) | 165.7(3) | 143.5(3) |
|  | *2.261(6)* | *36.1(2)* | *103.4(2)* | *113.2(2)* | *80.8(2)* | *90.1(2)* | *165.8(2)* | *144.5(2)* |
| N(62) | 2.278(9) |  | 113.8(3) | 101.2(3) | 91.3(3) | 115.9(3) | 149.6(3) | 117.6(7) |
|  | *2.235(6)* |  | *113.4(2)* | *100.1(2)* | *91.7(2)* | *116.0(2)* | *149.9(2)* | *117.5(2)* |
| N(51) | 2.269(8) |  |  | 35.6(3) | 142.5(3) | 108.8(3) | 85.2(3) | 111.6(3) |
|  | *2.248(6)* |  |  | *36.1(2)* | *143.2(2)* | *109.9(2)* | *84.8(2)* | *111.1(2)* |
| N(52) | 2.247(8) |  |  |  | 165.9(3) | 139.2(3) | 80.2(3) | 91.8(3) |
|  | *2.243(6)* |  |  |  | *166.0(2)* | *140.6(2)* | *80.3(2)* | *91.1(2)* |
| N(41) | 2.546(8) |  |  |  |  | 33.8(3) | 85.7(3) | 76.5(2) |
|  | *2.535(6)* |  |  |  |  | *33.4(2)* | *85.7(2)* | *76.7(2)* |
| N(42) | 2.398(9) |  |  |  |  |  | 76.3(3) | 86.0(3) |
|  | *2.358(5)* |  |  |  |  |  | *76.1(2)* | *86.0(2)* |
| N(31) | 2.572(8) |  |  |  |  |  |  | 32.5(3) |
|  | *2.569(6)* |  |  |  |  |  |  | *33.0(2)* |
| N(32) | 2.425(7) |  |  |  |  |  |  |  |
|  | *2.401(6)* |  |  |  |  |  |  |  |

†Ln(1)···Ln(2) are 3.6020(7), *3.5418(4)* Å

**Table S4** Metal atom environments for [Ln(Ph2pz)3(Ph2pzH)2] (Ln = La, Gd, Yb, listed in this sequence);*r* is the Ln-N bond length (Å), the other entries in the matrix being the angles (o) subtended at Ln by the relevant atoms at the head of the row and column. Primed atoms are related by the intramolecular two-fold rotor.

| Atom | *r* | N(12) | N(21) | N(32) | N(11') | N(12') | N(21') | N(32') |
| --- | --- | --- | --- | --- | --- | --- | --- | --- |
| N(11) | 2.531(3) | 31.9(1) | 75.05(9) | 92.13(9) | 168.20(9) | 137.4(1) | 102.99(9) | 99.22(9) |
|  | 2.412(2) | 33.41(6) | 76.34(6) | 91.69(6) | 169.31(6) | 136.87(6) | 101.70(6) | 98.56(6) |
|  | 2.333(2) | 34.94(7) | 77.40(6) | 91.87(7) | 169.09(7) | 135.00(7) | 100.49(6) | 98.56(9) |
| N(12) | 2.509(3) |  | 87.82(9 | 123.11(9 | 137.4(1) | 113.52(9) | 82.02(9) | 120.45(9) |
|  | 2.397(2) |  | 88.36(6) | 124.36(6) | 136.87(6) | 111.43(6) | 80.04(6) | 120.96(5) |
|  | 2.321(2) |  | 88.34(6) | 126.35(7) | 135.00(7) | 107.35(7) | 78.74(6) | 122.57(6) |
| N(21) | 2.692(3) |  |  | 83.15(9) | 102.99(9) | 82.02(9) | 161.43(9) | 115.42(9) |
|  | 2.582(2) |  |  | 83.56(6) | 101.70(6) | 80.04(6) | 159.37(6) | 117.07(6) |
|  | 2.528(2) |  |  | 83.60(7) | 100.49(6) | 78.74(6) | 158.18(6) | 118.22(7) |
| N(32) | 2.489(3) |  |  |  | 99.22(9) | 120.45(9) | 115.42(9) | 32.3(1) |
|  | 2.383(2) |  |  |  | 98.56(6) | 120.96(5) | 117.07(6) | 33.51(6) |
|  | 2.316(2) |  |  |  | 98.56(7) | 122.57(6) | 118.22(7) | 34.62(7) |

Ln-N(n1)-C(n5) are 178.1(2), 179.0(2), 179.7(2); 138.8(2), 138.9(1), 138.9(1); (178.0(3), 178.5(2), 179.2(2)); Ln-N(n2)-C(n3) are 176.5(3), 177.2(2), 178.1(2); n/a (x3) 178.0(3), 178.5(2), 179.2(2) (n = 1-3). In ligand 2, Ln-N(21)-N(22) are 116.8(2), 116.9(1), 117.0(1)o. Ln lie 0.069(6), 0.132(7), 0.001(7); 0.049(4), 0.067(4), 0.001(4); 0.042(4), 0.079(4), 0.005(4) Å out of the C3N2 pz planes 1,2,3 respectively. All the values given are for the La, Gd, Yb complexes respectively.
